# Supplementary material for: SERS enhancement by aggregated Au colloids: effect of particle size
Source: Royal Society of Chemistry journal article supplement (doi:10.1039/b906049a), 2009-01-01
Supplement: b906049a.pdf [file b906049a.pdf]

### Supplementary Information

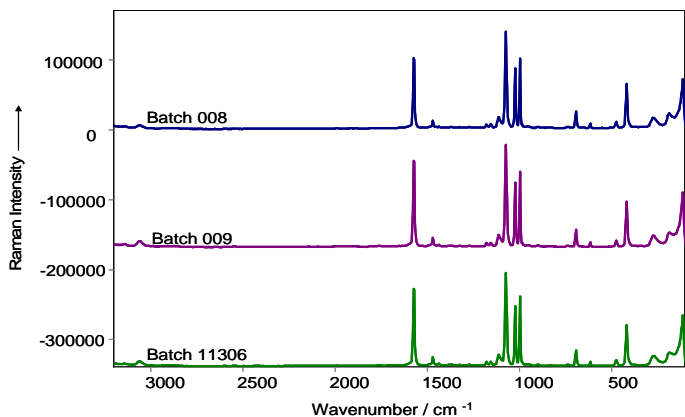

Supplementary Figure 1. SERS spectra from three different batches of nominally 50 nm Au colloid. Absolute SERS intensities vary by < 9%. The particle sizes of the original sample and 3 different batches were found to be extremely similar at  $45.5 \pm 0.1$ ,  $45.8 \pm 0.4$ ,  $45.8 \pm 0.4$ ,  $45.9 \pm 0.3$  nm.

21 nm Au Colloid aggregated with  $0.016 \text{ mol dm}^{-3} \text{ MgSO}_4$ : MAG: 15,000 x, 71,000 x, 71,000 x, 48,000 x

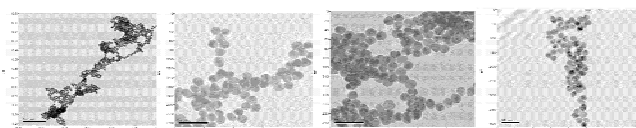

48 nm Au Colloid aggregated with  $0.016 \text{ mol dm}^{-3} \text{ MgSO}_4$ : MAG: 7,000 x, 38,000 x, 38,000 x, 71,000 x

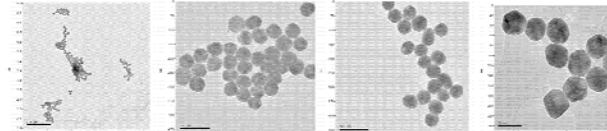

74 nm Au Colloid aggregated with  $0.016 \text{ mol dm}^{-3} \text{ MgSO}_4$ : MAG: 29,000x, 29,000 x, 38,000 x

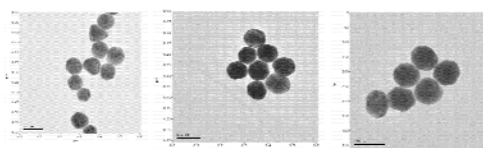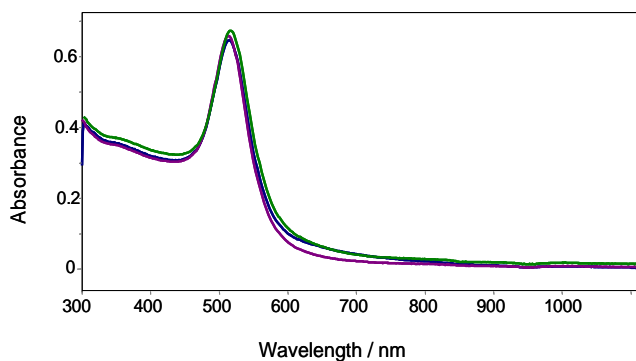

Supplementary Figure 2. Uv/vis spectra from each of the three batches of nominal 50 nm particles (as above). Absorbance at  $\lambda_{\text{max}}$  varies by just 3%.

20

Supplementary Figure 4. TEM images of aggregated particles with the diameters shown on the Figures.

25

10

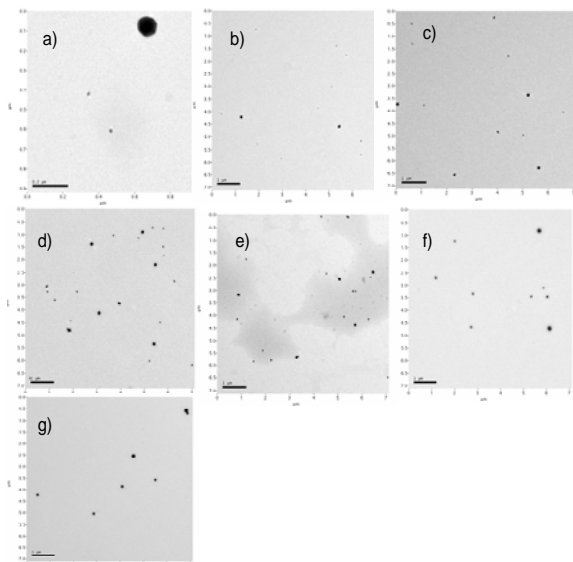

Supplementary Figure 3. TEM images from ratios of mixed particle sizes stabilised within Polycarophil® and deposited on a 300 mesh Formvar supported copper grid. Approximately 30 overview images for each of these combinations were taken at *ca.* 5000x magnification. a) 20nm : 100nm b) 30nm : 100nm c) 40nm : 100nm d) 50nm : 100nm e) 60nm : 100nm f) 100nm : 150nm g) 80nm : 150nm.

15
